# Supplementary material for: An optogenetic system to control membrane phospholipid asymmetry through flippase activation in budding yeast
Source: PubMed Central journal article supplement (PMC7385178; doi:10.1038/s41598-020-69459-0), 2020-07-27
Supplement: 41598_2020_69459_MOESM1_ESM.pdf [file 41598_2020_69459_MOESM1_ESM.pdf]

## Supplemental Information

### **An Optogenetic System to Control Membrane Phospholipid Asymmetry through Flippases activation in Budding Yeast.**

#### **Authors:**

Tomomi Suzuki<sup>1,2,\*</sup>, Tetsuo Mioka<sup>3</sup>, Kazuma Tanaka<sup>3</sup> and Akira Nagatani<sup>1,\*</sup>

#### **Author affiliations:**

<sup>1</sup>Department of Botany, Graduate School of Science, Kyoto University, Kyoto 606-8502, Japan

<sup>2</sup>PRESTO, Japan Science and Technology Agency, Kawaguchi, Saitama 332-0012, Japan

<sup>3</sup>Division of Molecular Interaction, Institute for Genetic Medicine, Hokkaido University Graduate School of Life Science, Kita-ku, Sapporo 060-0815, Japan

\*Corresponding author:

Contact email: [tomo@physiol.bot.kyoto-u.ac.jp](mailto:tomo@physiol.bot.kyoto-u.ac.jp) and [nagatani@physiol.bot.kyoto-u.ac.jp](mailto:nagatani@physiol.bot.kyoto-u.ac.jp)

## Supplementary Figures

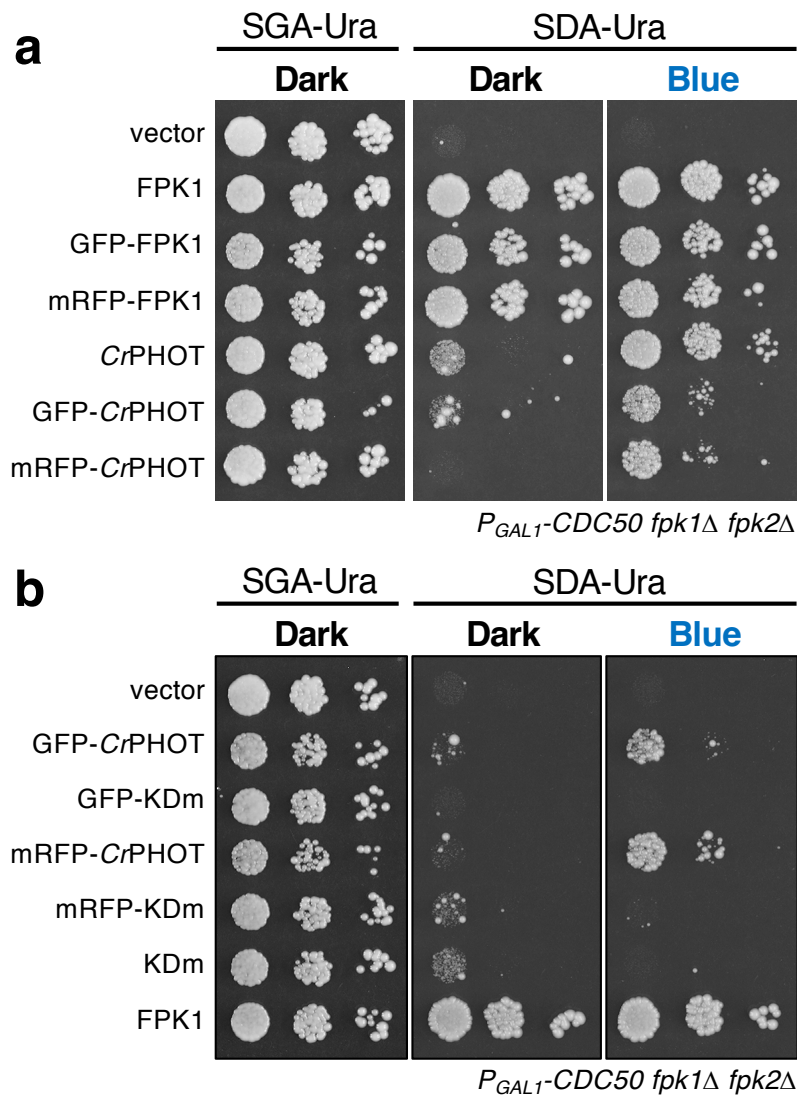

**Supplementary Figure S1. The fluorescent-protein tagged *Crphot* and KDm are also functional.** Growth of the yeast conditional mutant *P<sub>GAL1</sub>-CDC50 fpk1Δ fpk2Δ* expressing GFP or mRFP tagged *CrPHOT* (a) and KDm, kinase-dead mutant with D549N (b). Yeast cells were serially diluted and spotted onto plates containing galactose (SGA-Ura) or glucose (SDA-Ura), which were incubated in darkness (Dark), or under 10  $\mu\text{mol m}^{-2} \text{s}^{-1}$  BL irradiation (Blue) at 28 °C for 3 days.

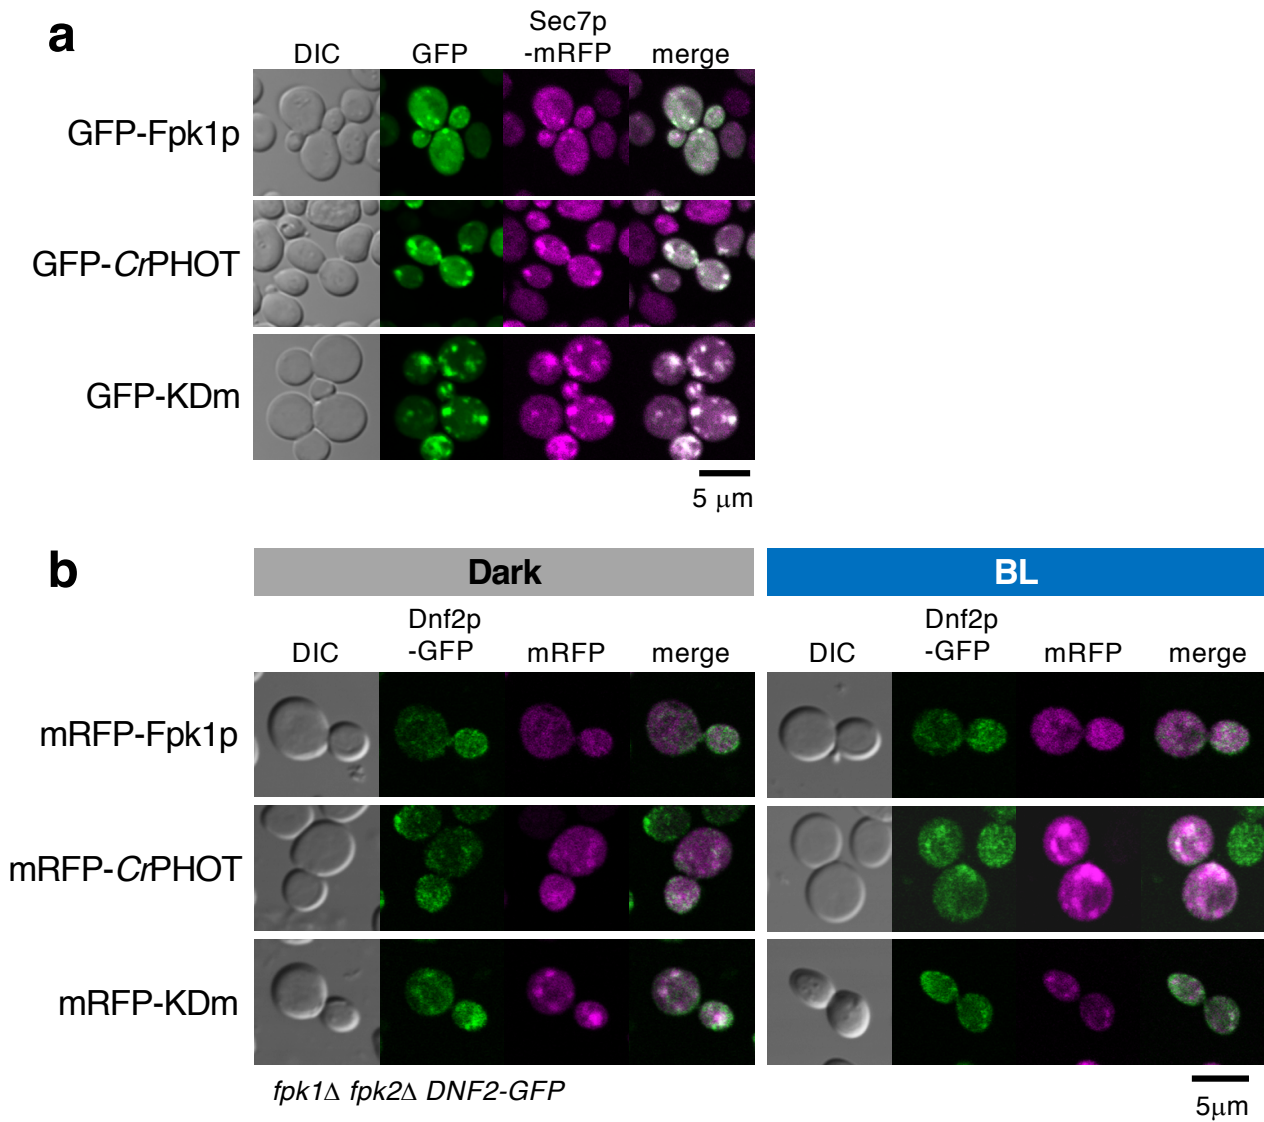

**Supplementary Figure S2. Colocalization of *Cr*PHOT with Dnf2p or Sec7p.** **a** Confocal images of YKT905 (*SEC7-mRFP*) cells expressing GFP tagged Fpk1p, *Cr*PHOT and KDm proteins under room light. **b** Confocal images of KKT336 (*fpk1 $\Delta$  fpk2 $\Delta$ , DNF2-GFP*) cells expressing mRFP tagged Fpk1p, *Cr*PHOT and KDm proteins. Yeast cells cultured in darkness (Dark) or under BL irradiation (Blue). Images merged to compare the two signal patterns. Scale bars = 5  $\mu$ m.

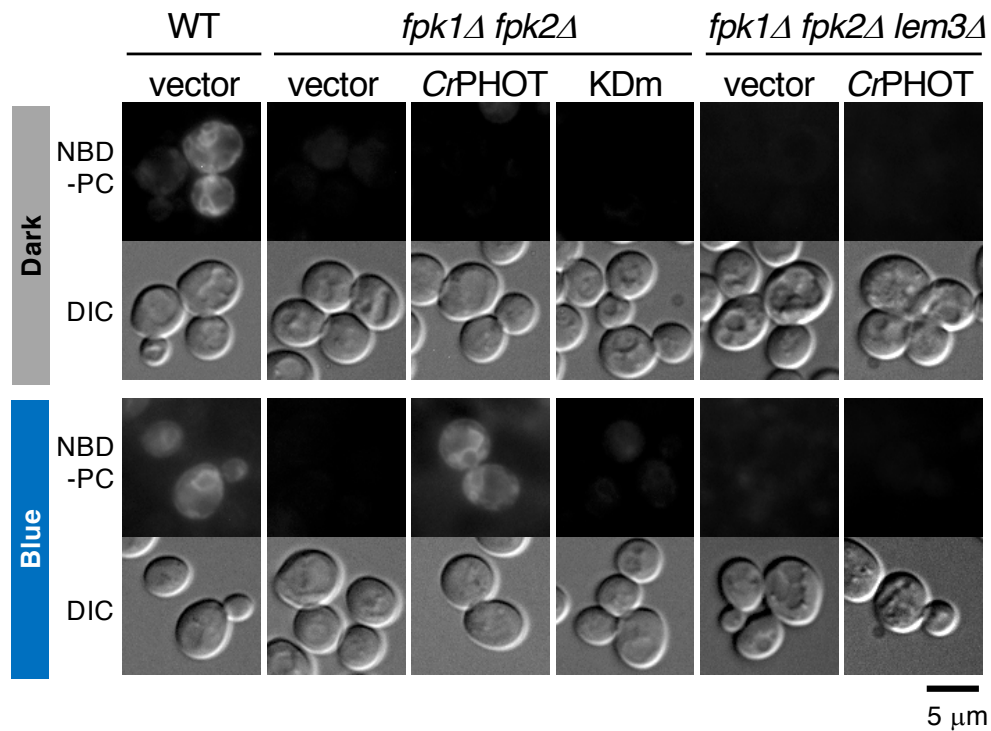

**Supplementary Figure S3. NBD-PC internalization by *CrPHOT* under BL.** Wild-type (WT) harbouring vector plasmids, *fpk1Δ fpk2Δ* mutant harboring vector, *CrPHOT* or KDm plasmids, and KKT274 (*fpk1Δ fpk2Δ lem3Δ*) harboring vector or *CrPHOT* plasmids were grown in SC medium in the dark (Dark) or under BL (Blue) at 30 °C, and treated with NBD-PC. A representative cell image by confocal microscopic observation in each condition is shown. Scale bar = 5 μm.

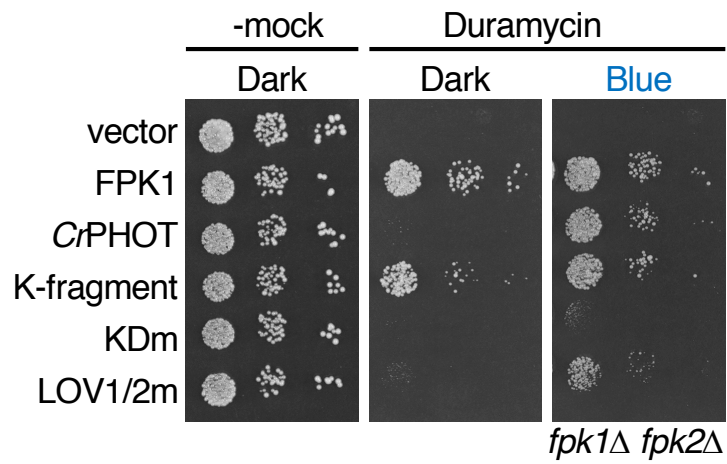

**Supplementary Figure S4. Optical control of PE amount in the outer leaflet of the plasma membrane in a kinase-dependent-manner.** Growth sensitivity of *fpk1Δ fpk2Δ* cells carrying pRS416-CrPHOT or its derivatives to PE-specific binding antibiotics, duramycin. Yeast cells were cultured in YPDA medium at 28 °C, serially diluted and spotted on to YPDA plate with or without 20 μM duramycin, which were incubated in darkness (Dark), or under BL irradiation (Blue) 28 °C for 2 days.

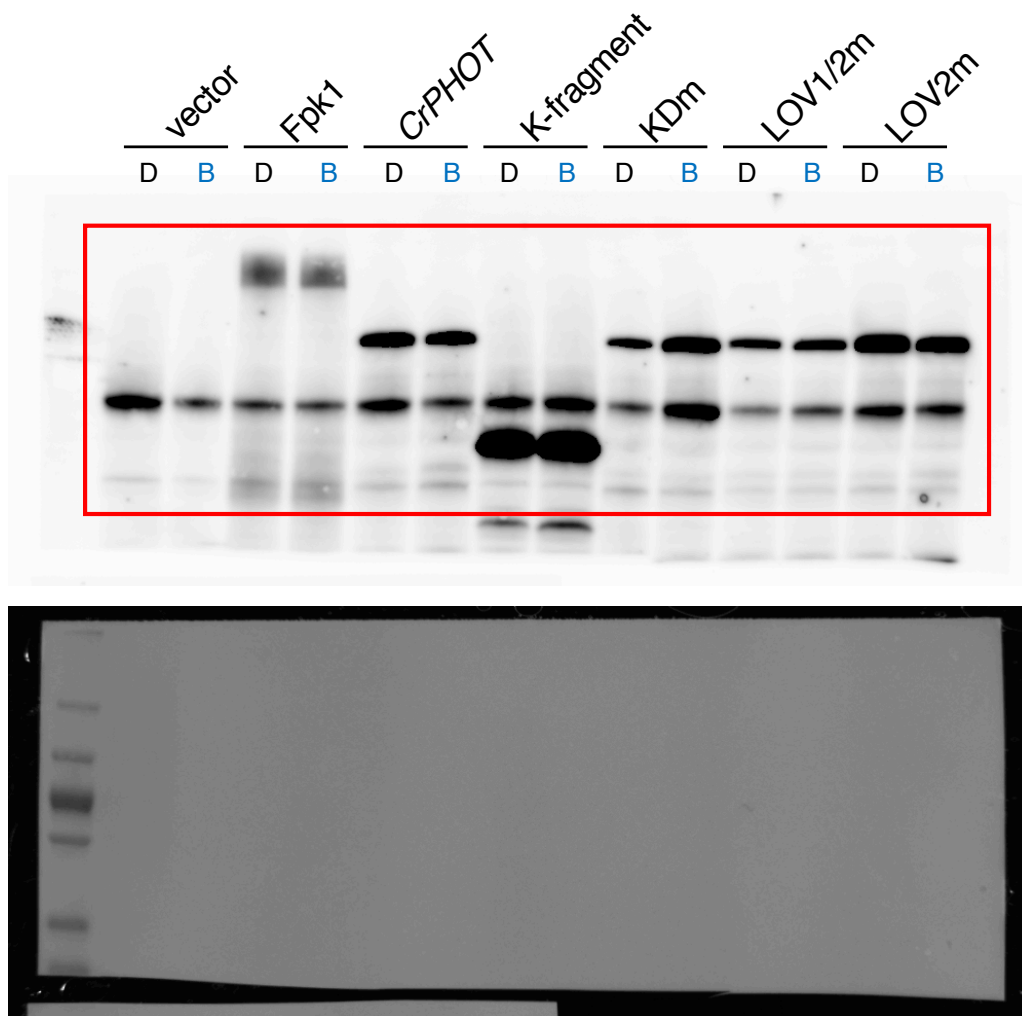

**Supplementary Figure S5.** The original unprocessed images of Western blots for Figure 1. Raw data of Western blots (upper panel) with corresponding membrane (lower panel). The area used in Fig. 1 is indicated by a red frame.
